# Supplementary figures and images for: Sensitivity of Yeast Strains with Long G-Tails to Levels of Telomere-Bound Telomerase
Source: PLOS journal article supplement (doi:10.1371/journal.pgen.0030105), 2007-06-14

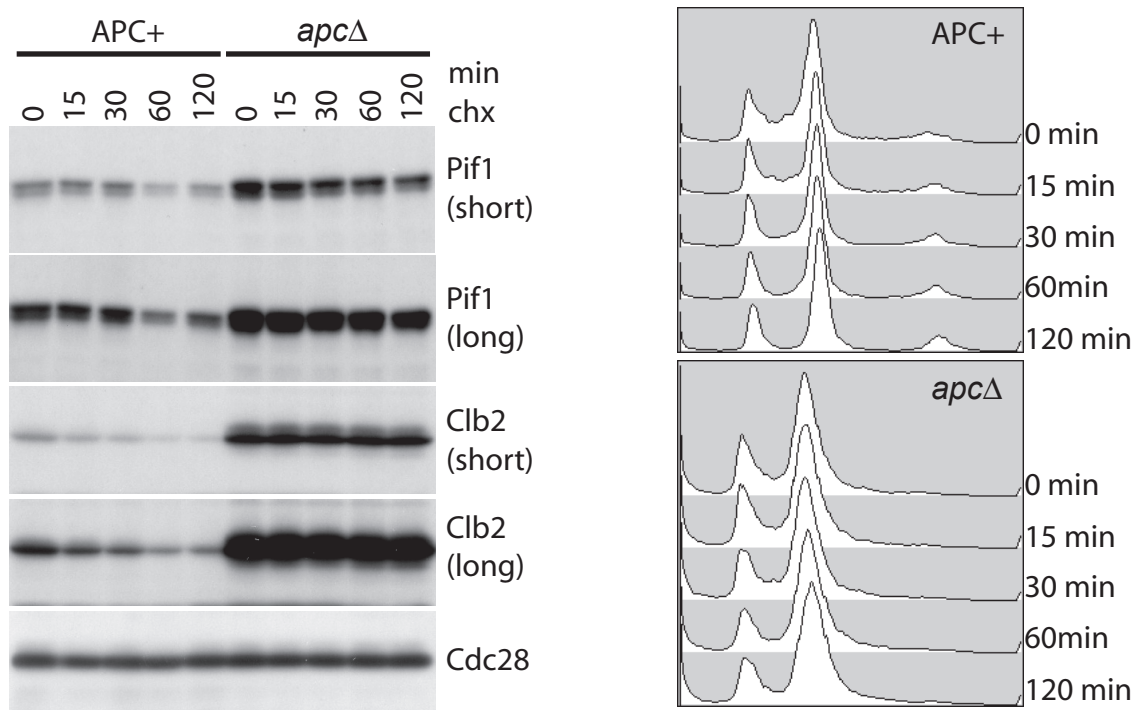

**SUPPLEMENTARY FIGURE 1**  
Vega et al

Supplement: S1 (10.1371/journal.pgen.0030105.s001) [file journal.pgen.0030105.s001]
